# Supplementary material
Source: HighWire-hosted journal article supplement (http://ajevonline.org/highwire/filestream/9350/field_highwire_adjunct_files/0/214SuppFigs1-2.pdf)
Supplement: 214SuppFigs1-2.pdf [file 214SuppFigs1-2.pdf]

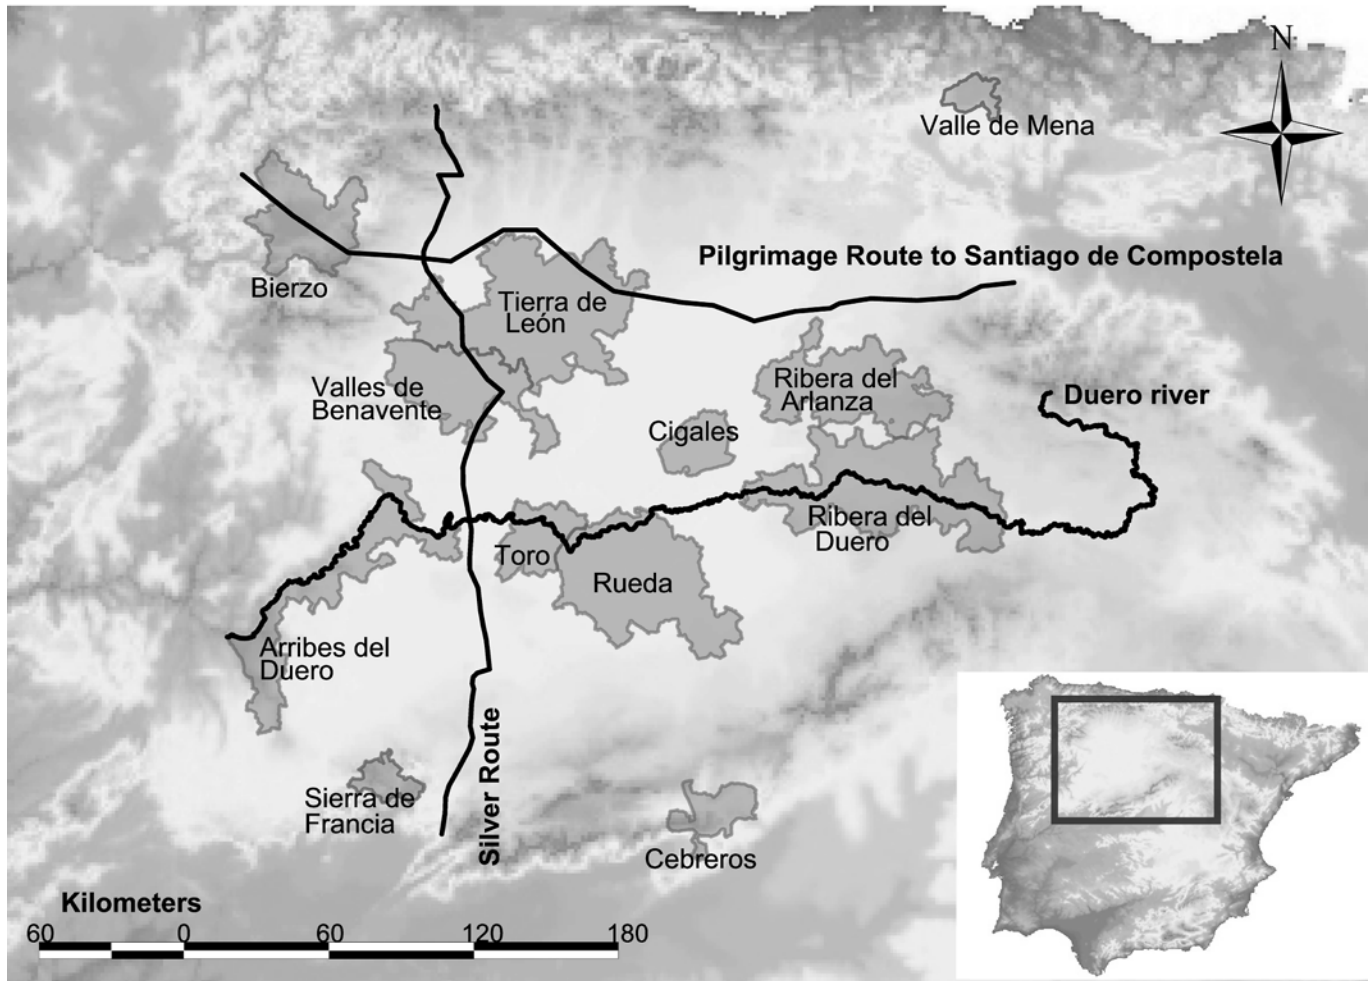

**Supplemental Figure 1** Viticulture areas and traditional trade and pilgrimage routes on the Castilian Plateau.

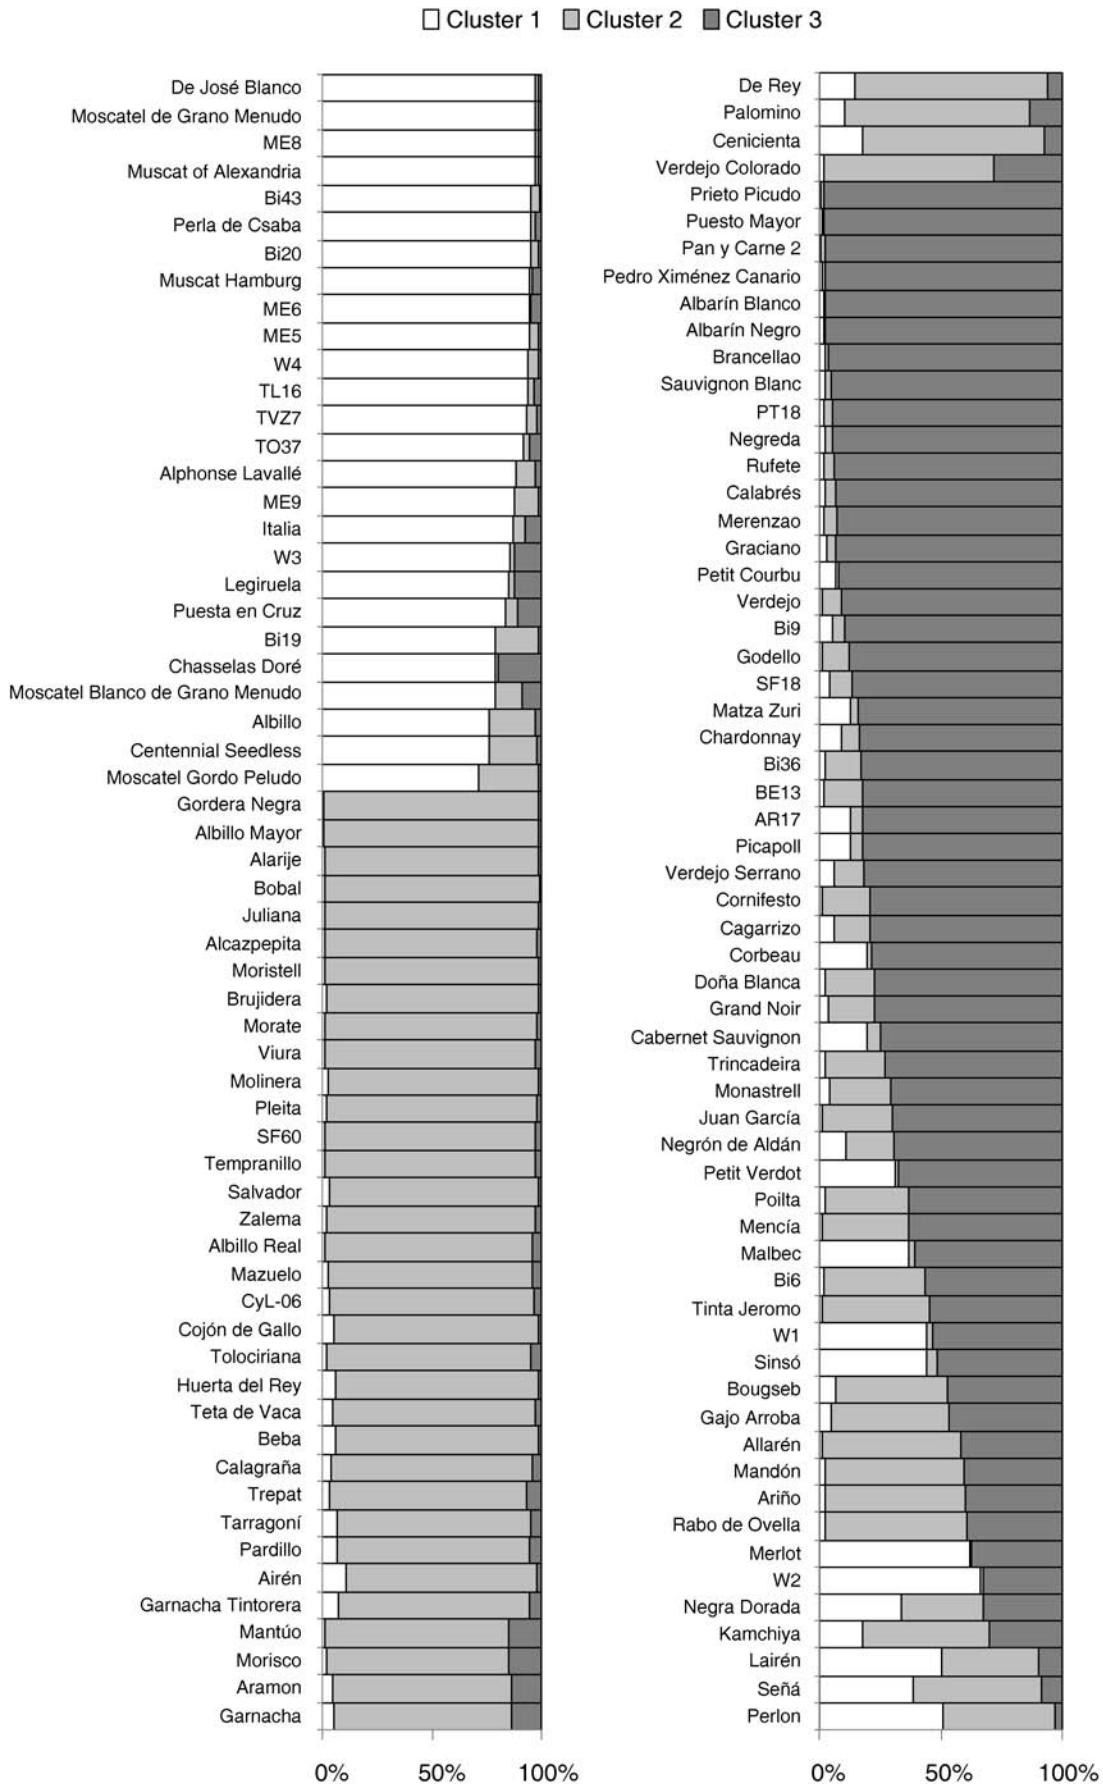

**Supplemental Figure 2** Proportions of ancestry of individual genotypes at 22 SSRs in each of K = 3 genetic clusters estimated with Structure.
